# Supplementary material for: Covalency in actinide(iv) hexachlorides in relation to the chlorine K-edge X-ray absorption structure
Source: Royal Society of Chemistry journal article supplement (doi:10.1039/d1sc06454a), 2022-01-01
Supplement: d1sc06454a1.pdf [file d1sc06454a1.pdf]

# *Electronic Supplementary Information for:* Theoretical Study of Covalency in Actinide(IV) Hexachlorides in Relation to Chlorine K-Edge X-ray Absorption Structure

Dumitru-Claudiu Sergentu<sup>a</sup> and Jochen Autschbach<sup>a,\*</sup>

<sup>a</sup>Department of Chemistry  
University at Buffalo  
State University of New York  
Buffalo, NY 14260-3000, USA  
email: jochena@buffalo.edu

November 18, 2021

## Contents

|                                            |           |
|--------------------------------------------|-----------|
| <b>S1 Additional computational details</b> | <b>S3</b> |
|--------------------------------------------|-----------|

## List of Figures

|    |                                                                                                                                                                                                                                                                                                                                                                               |    |
|----|-------------------------------------------------------------------------------------------------------------------------------------------------------------------------------------------------------------------------------------------------------------------------------------------------------------------------------------------------------------------------------|----|
| S1 | Unrestricted DFT/PBE0 calculations. Left panel: Qualitative MO diagram depicting the An 6d $e_g$ and $t_{2g}$ and 5f $a_{2u}$ , $t_{2u}$ and $t_{1u}$ energy levels of $[\text{AnCl}_6]^{2-}$ (An = Th–Pu) systems. Right panel: Isosurface plots ( $\pm 0.03$ au) of the 5f $t_{2u}$ , $t_{1u}$ and 6d $t_{2g}$ $\alpha$ -spin MOs with An–Cl antibonding character. . . . . | S4 |
| S2 | Selected NLMOs ( $\pm 0.03$ au isosurfaces) and their An weight-% composition representative of the An–Cl bonding interactions in $[\text{AnCl}_6]^{2-}$ (An = Th–Pu). Left panel: CAS(12+n, 13) SF calculations. Right panel: UKS/PBE0 SF calculations. For the An = U–Pu complexes, the ( $\alpha$ -spin) NLMOs shown are those of $[\text{PuCl}_6]^{2-}$ .                 | S5 |
| S3 | GS bonding $t_{2u}$ and $t_{1u}$ MOs ( $\pm 0.03$ au isosurfaces) of $[\text{AnCl}_6]^{2-}$ (An = Th–Pu). CAS(12+n, 13) calculations. . . . .                                                                                                                                                                                                                                 | S6 |
| S4 | GS 5f-based (antibonding) $t_{2u}$ and $t_{1u}$ MOs ( $\pm 0.03$ au isosurfaces) of $[\text{AnCl}_6]^{2-}$ (An = Th–Pu). Spin-free core RAS calculations. . . . .                                                                                                                                                                                                             | S7 |

|    |                                                                                                                                                                                                                                                                                                                                                                                                                                                                                                                                                                                                         |    |
|----|---------------------------------------------------------------------------------------------------------------------------------------------------------------------------------------------------------------------------------------------------------------------------------------------------------------------------------------------------------------------------------------------------------------------------------------------------------------------------------------------------------------------------------------------------------------------------------------------------------|----|
| S5 | Upper figure: Calculated vs. experimental Cl K-edge XANES in $[\text{ThCl}_6]^{2-}$ . Bottom figure: The ‘stick’ spectra underlying the calculated Cl K edge is shown as oscillator strengths scaled by the number of core-excited electrons into Th 5f (blue) and 6d (red) orbitals. . . . .                                                                                                                                                                                                                                                                                                           | S8 |
| S6 | Calculated vs. experimental Cl K-edge XANES data in $[\text{AnCl}_6]^{2-}$ with An = U (panel a), Np (b), and Pu (c). First row: Cl K-edge spectra. Second row: An $n_d$ Mulliken population in the GS vs. low-energy core ESs with oscillator strength $f > 10^{-5}$ . Third row: Cl 3p Mulliken population in the GS vs. low-energy core ESs with oscillator strength $f > 10^{-5}$ . Fourth row: An–Cl $\rho^{bcp}$ QTAIM metric in the GS vs. low-energy core ESs with oscillator strength $f > 10^{-5}$ . Experimental spectra were digitized from graphical material published in Ref. 1. . . . . | S9 |

## List of Tables

|    |                                                                                                                                                                                                                                                                   |     |
|----|-------------------------------------------------------------------------------------------------------------------------------------------------------------------------------------------------------------------------------------------------------------------|-----|
| S1 | Gaussian broadening ( $\sigma$ , in eV) values used to generate the calculated Cl K-edge XANES spectra (XPT2//core RAS-SF and XPT2//core RAS-SO) and the energy shift (in eV) applied to align the calculated spectra with the experimental counterparts. . . . . | S10 |
| S2 | Decomposition of the NPA f-shell total population ( $n_f$ ) in terms of contributions from 5f and 6f AOs. . . . .                                                                                                                                                 | S10 |
| S3 | UKS/PBE0 calculations. Metal f-shell ( $n_f$ ) and d-shell ( $n_d$ ) populations from NPA (Mulliken) analyses, NPA metal charge [ $q(\text{An})$ ], and Mayer / Wiberg bond order (MBO / WBO) for $[\text{AnCl}_6]^{2-}$ (An = Th–Pu). . . . .                    | S11 |
| S4 | UKS/PBE0 QTAIM metrics calculated at the An–Cl bond critical points (BCPs) of the $[\text{AnCl}_6]^{2-}$ (An = Th–Pu) complexes. . . . .                                                                                                                          | S11 |

## S1 Additional computational details

### Choice of active spaces and state interaction schemes.

**Valence CAS calculations:** For the open-shell  $[\text{AnCl}_6]^{2-}$  (An = U–Pu) systems, the valence electronic structures are explored with CAS( $n$ , 7) and CAS( $12+n$ , 13) with  $n = 0$  (Th, Hartree-Fock calculation), 2 (U), 3 (Np) and 4 (Pu). The correlated orbitals are the An 5f orbitals in CAS( $n$ , 7), and additionally the  $3 \times \text{Cl}(3p)$  orbitals of  $t_{1u}$  symmetry (bonding counterparts of the 5f  $t_{1u}$  antibonding orbitals) + the  $3 \times \text{An}$  6p orbitals in CAS( $12+n$ , 13). CAS wavefunctions were calculated in separate state-average runs for all possible configurations per multiplicity block and per irreducible representation of the  $D_{2h}$  point group, i.e. 21 triplets and 28 singlets for  $[\text{UCl}_6]^{2-}$ , 35 quartets and 84 doublets for  $[\text{NpCl}_6]^{2-}$ , and 35 quintets, 210 triplets and 196 singlets for  $[\text{PuCl}_6]^{2-}$ .

**Core RAS calculations:** Ligand K-edge XANES was calculated with the core RAS approach following a similar strategy and active space selection as in our previous work on various cerium and actinide complexes.<sup>2–4</sup> In these calculations, the six Cl  $1s^2$  orbitals with at most one electron-hole spanned RAS1, the seven actinide  $5f^n$  orbitals ( $1 \times a_{2u}$ ,  $3 \times t_{1u}$ ,  $3 \times t_{2u}$  in  $O_h$ ) spanned RAS2, and the three actinide 6d orbitals ( $3 \times t_{2g}$  in  $O_h$ ) with at most one electron occupation spanned RAS3. Since we focused on the description of the Cl K-edge XANES below  $\sim 2824$  eV, known to be generated by core transitions into the 5f and 6d  $t_{2g}$  valence orbitals,<sup>1,5</sup> the remaining two 6d  $e_g$  orbitals were not included in the active spaces. For each  $[\text{AnCl}_6]^{2-}$  complex, all electric-dipole-allowed core excited states (ESs) were calculated in separate state-average runs per any possible spin-multiplicity block and per  $D_{2h}$  irrep. Due to technical reasons related to degeneracies breaking with the CAS second-order perturbation theory (CAS-PT2), dynamic correlation was introduced with a series of individual single-state single-reference extended multistate (XMS) PT2<sup>6</sup> (XPT2) calculations for each state, or group of degenerate states. The XPT2 calculations used an IPEA shift of zero and a very large imaginary shift (IMAG) of 2 Hartree in order to eliminate intruder states and to improve the similarity in the reference weights between the valence states and the core ESs.

**Core RAS + RASSI:** For  $[\text{ThCl}_6]^{2-}$  and  $[\text{UCl}_6]^{2-}$ , all the calculated core ESs were used in restricted active space state interaction (RASSI) calculations to compute SO couplings and electric-dipole oscillator strengths. Since the number of core ESs is too large, RASSI calculations were performed with a reduced number of core ESs (determined by convergence of the Cl K edge XANES) in the cases of  $[\text{NpCl}_6]^{2-}$  and  $[\text{PuCl}_6]^{2-}$ . Concerning  $[\text{NpCl}_6]^{2-}$ , all spin-sextet core ESs were retained in RASSI, plus 201 spin-doublet and 201 spin-quartet ESs per each *gerade* irrep of  $D_{2h}$ . Concerning  $[\text{PuCl}_6]^{2-}$ , all spin-septet core ESs were retained in RASSI plus 201 spin-quintet, 201 spin-triplet and 201 spin-singlet core ESs per each *ungerade* irrep of  $D_{2h}$ . For all  $[\text{AnCl}_6]^{2-}$  complexes, in addition to the core ESs, all valence states of all possible spin-multiplicities arising from  $\text{An}^{\text{IV}} 5f^n$  were retained in RASSI.

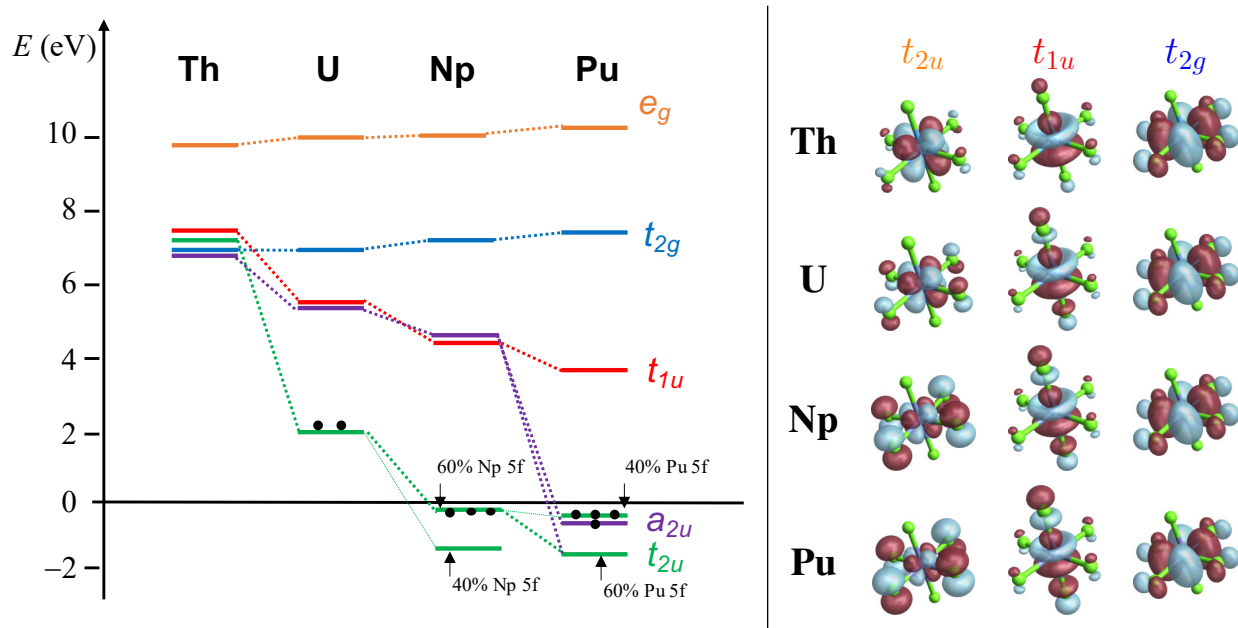

Figure S1: Unrestricted DFT/PBE0 calculations. Left panel: Qualitative MO diagram depicting the An 6d  $e_g$  and  $t_{2g}$  and 5f  $a_{2u}$ ,  $t_{2u}$  and  $t_{1u}$  energy levels of  $[\text{AnCl}_6]^{2-}$  (An = Th–Pu) systems. Right panel: Isosurface plots ( $\pm 0.03$  au) of the 5f  $t_{2u}$ ,  $t_{1u}$  and 6d  $t_{2g}$   $\alpha$ -spin MOs with An–Cl antibonding character.

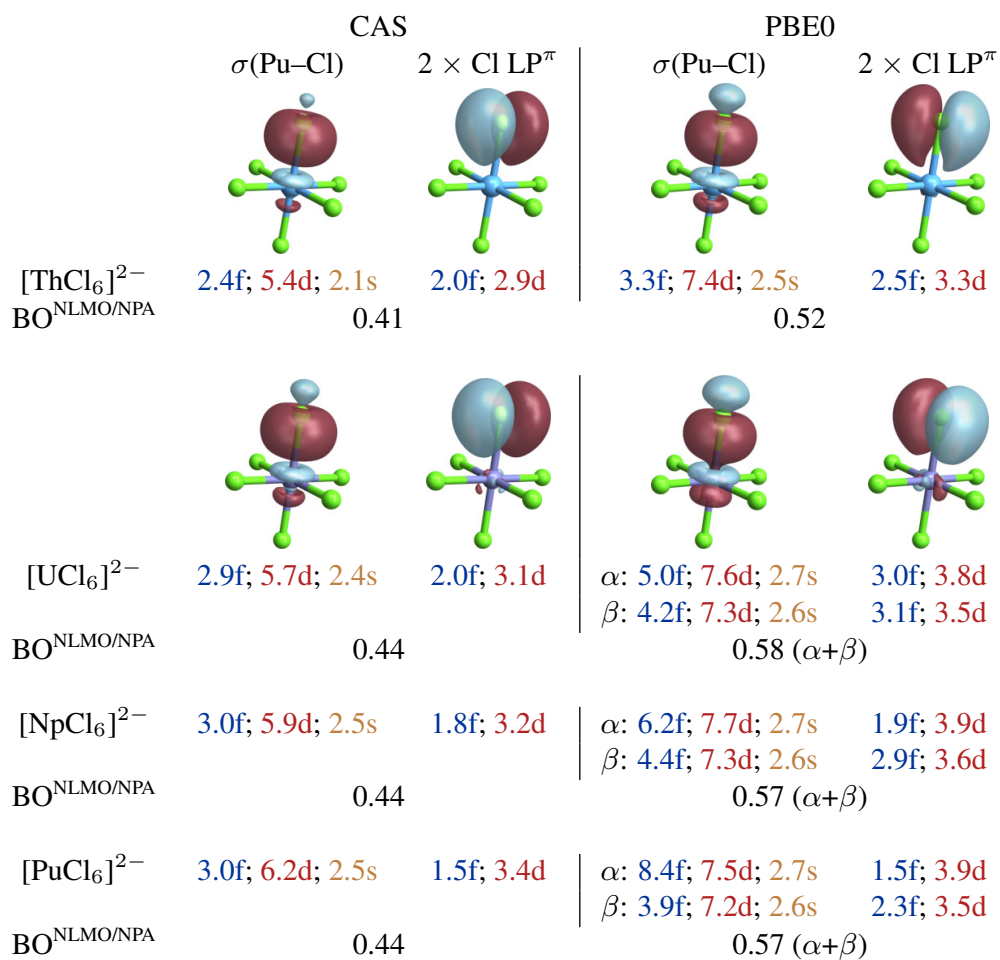

Figure S2: Selected NLMOs ( $\pm 0.03$  au isosurfaces) and their An weight-% composition representative of the An-Cl bonding interactions in  $[\text{AnCl}_6]^{2-}$  (An = Th-Pu). Left panel: CAS(12+n, 13) SF calculations. Right panel: UKS/PBE0 SF calculations. For the An = U-Pu complexes, the ( $\alpha$ -spin) NLMOs shown are those of  $[\text{PuCl}_6]^{2-}$ .

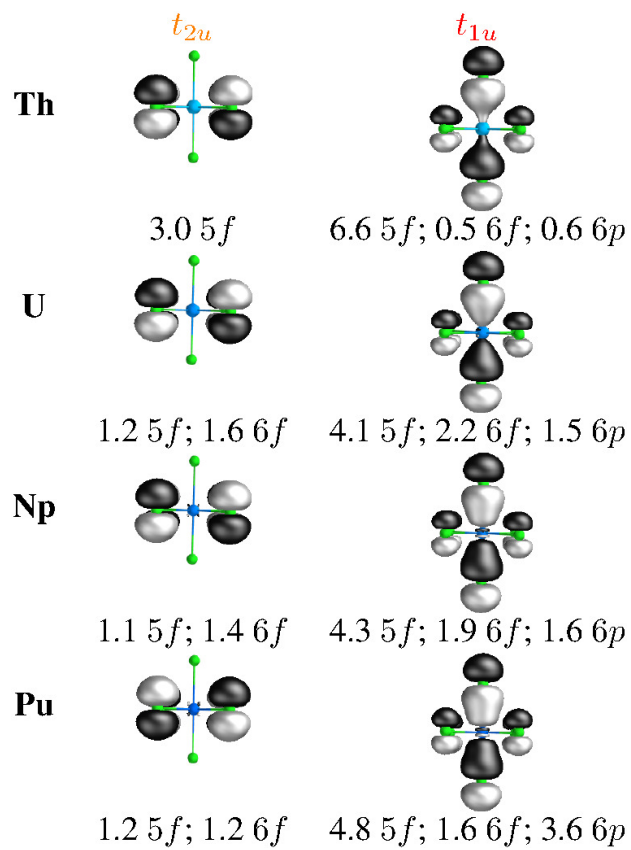

Figure S3: GS bonding  $t_{2u}$  and  $t_{1u}$  MOs ( $\pm 0.03$  au isosurfaces) of  $[\text{AnCl}_6]^{2-}$  (An = Th–Pu). CAS(12+n, 13) calculations.

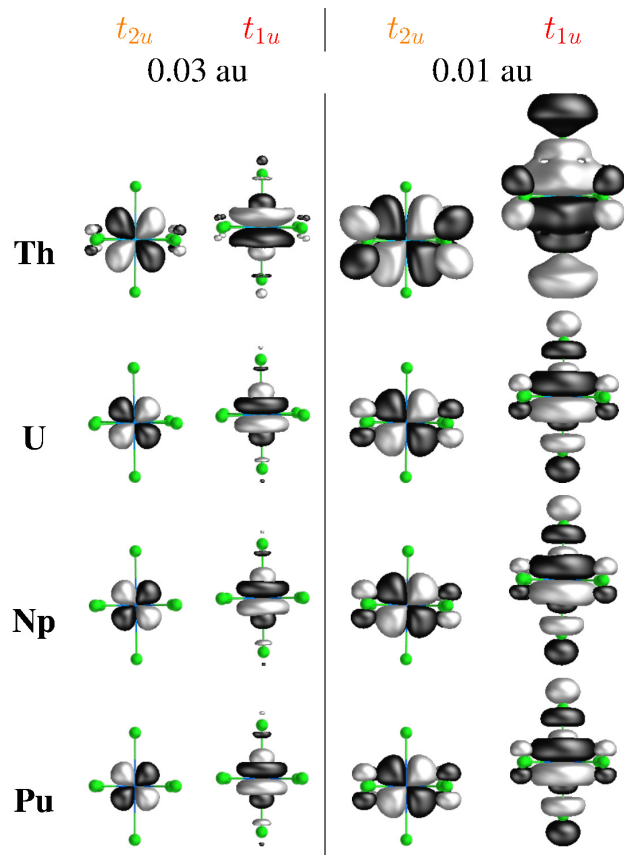

Figure S4: GS 5f-based (antibonding)  $t_{2u}$  and  $t_{1u}$  MOs ( $\pm 0.03$  au isosurfaces) of  $[\text{AnCl}_6]^{2-}$  (An = Th–Pu). Spin-free core RAS calculations.

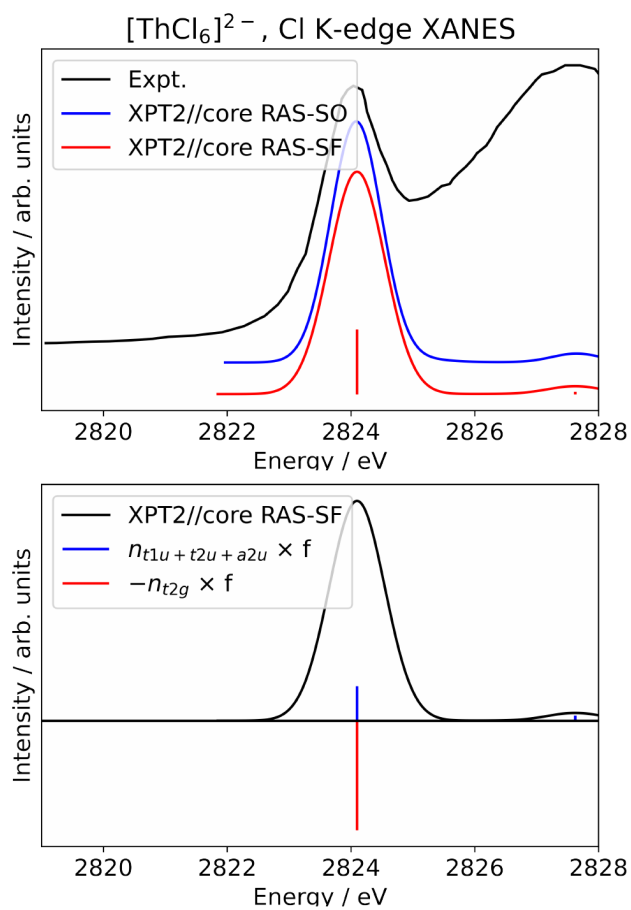

Figure S5: Upper figure: Calculated vs. experimental Cl K-edge XANES in [ThCl<sub>6</sub>]<sup>2-</sup>. Bottom figure: The ‘stick’ spectra underlying the calculated Cl K edge is shown as oscillator strengths scaled by the number of core-excited electrons into Th 5f (blue) and 6d (red) orbitals.



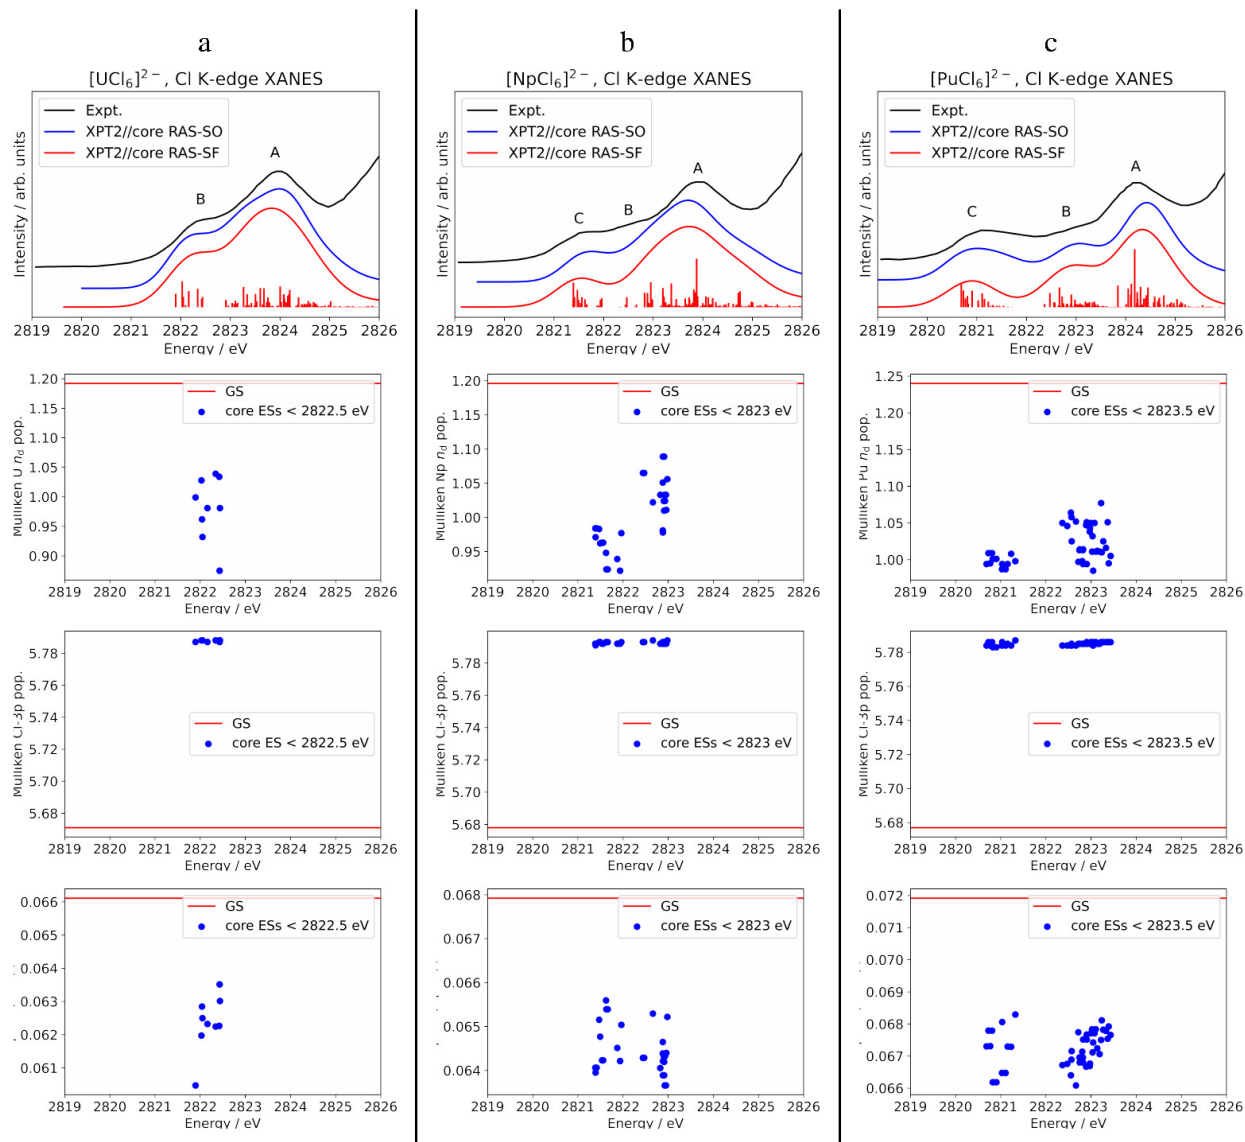

Figure S6: Calculated vs. experimental Cl K-edge XANES data in  $[\text{AnCl}_6]^{2-}$  with  $\text{An} = \text{U}$  (panel a),  $\text{Np}$  (b), and  $\text{Pu}$  (c). First row: Cl K-edge spectra. Second row:  $\text{An } n_d$  Mulliken population in the GS vs. low-energy core ESs with oscillator strength  $f > 10^{-5}$ . Third row: Cl 3p Mulliken population in the GS vs. low-energy core ESs with oscillator strength  $f > 10^{-5}$ . Fourth row:  $\text{An-Cl } \rho^{bcp}$  QAIM metric in the GS vs. low-energy core ESs with oscillator strength  $f > 10^{-5}$ . Experimental spectra were digitized from graphical material published in Ref. 1.

Table S1: Gaussian broadening ( $\sigma$ , in eV) values used to generate the calculated Cl K-edge XANES spectra (XPT2//core RAS-SF and XPT2//core RAS-SO) and the energy shift (in eV) applied to align the calculated spectra with the experimental counterparts.

|                    | $[\text{ThCl}_6]^{2-}$ | $[\text{UCl}_6]^{2-}$ | $[\text{NpCl}_6]^{2-}$ | $[\text{PuCl}_6]^{2-}$ |
|--------------------|------------------------|-----------------------|------------------------|------------------------|
| $\sigma$ (SF / SO) | 0.45 / 0.4             | 0.45 / 0.4            | 0.45 / 0.4             | 0.45 / 0.4             |
| Shift (SF / SO)    | 20.35 / 20.35          | 20.3 / 20.3           | 20 / 20                | 19.9 / 20.2            |

Table S2: Decomposition of the NPA f-shell total population ( $n_f$ ) in terms of contributions from 5f and 6f AOs.

| An | Approach    | 5f   | 6f   | $n_f$ |
|----|-------------|------|------|-------|
| Th | CAS(12, 13) | 0.76 | 0.04 | 0.80  |
|    | HF          | 0.75 | 0.03 | 0.78  |
|    | core RAS    | 0.75 | 0.03 | 0.78  |
|    | RKS/PBE0    | 1.00 | 0.03 | 1.03  |
| U  | CAS(14, 13) | 2.43 | 0.46 | 2.89  |
|    | CAS(2, 7)   | 2.39 | 0.46 | 2.85  |
|    | core RAS    | 2.39 | 0.46 | 2.85  |
|    | PBE0        | 3.04 | 0.31 | 3.35  |
| Np | CAS(15, 13) | 3.42 | 0.37 | 3.79  |
|    | CAS(3, 7)   | 3.39 | 0.37 | 3.76  |
|    | core RAS    | 3.39 | 0.37 | 3.76  |
|    | RKS/PBE0    | 4.15 | 0.21 | 4.36  |
| Pu | CAS(16, 13) | 3.45 | 0.23 | 4.68  |
|    | CAS(4, 7)   | 4.41 | 0.24 | 4.65  |
|    | core RAS    | 4.41 | 0.24 | 4.65  |
|    | RKS/PBE0    | 5.26 | 0.11 | 5.37  |

Table S3: UKS/PBE0 calculations. Metal f-shell ( $n_f$ ) and d-shell ( $n_d$ ) populations from NPA (Mulliken) analyses, NPA metal charge [ $q(\text{An})$ ], and Mayer / Wiberg bond order (MBO / WBO) for  $[\text{AnCl}_6]^{2-}$  (An = Th–Pu).

| An | $n_f$       | $n_d$       | MBO / WBO   | $q(\text{An})$ |
|----|-------------|-------------|-------------|----------------|
| Th | 1.03 (0.91) | 1.70 (1.55) | 0.99 / 0.89 | 0.904          |
| U  | 3.26 (3.04) | 1.78 (1.60) | 1.03 / 0.96 | 0.515          |
| Np | 4.23 (4.02) | 1.81 (1.61) | 1.05 / 0.96 | 0.563          |
| Pu | 5.22 (5.07) | 1.79 (1.56) | 1.05 / 0.94 | 0.588          |

Table S4: UKS/PBE0 QTAIM metrics calculated at the An–Cl bond critical points (BCPs) of the  $[\text{AnCl}_6]^{2-}$  (An = Th–Pu) complexes.

| An | $\rho^{bcp}$ | $\nabla^2\rho^{bcp}$ | $ V^{bcp} /G^{bcp}$ |
|----|--------------|----------------------|---------------------|
| Th | 0.062        | 0.139                | 1.318               |
| U  | 0.067        | 0.160                | 1.313               |
| Np | 0.069        | 0.164                | 1.326               |
| Pu | 0.072        | 0.165                | 1.350               |

## References

- [1] J. Su, E. R. Batista, K. S. Boland, S. E. Bone, J. A. Bradley, S. K. Cary, D. L. Clark, S. D. Conradson, A. S. Ditter, N. Kaltsoyannis, J. M. Keith, A. Kerridge, S. A. Kozimor, M. W. Löble, R. L. Martin, S. G. Minasian, V. Mocko, H. S. L. Pierre, G. T. Seidler, D. K. Shuh, M. P. Wilkerson, L. E. Wolfsberg and P. Yang, *J. Am. Chem. Soc.*, 2018, **140**, 17977–17984.
- [2] D.-C. Sergentu, T. J. Duignan and J. Autschbach, *J. Phys. Chem. Lett.*, 2018, **9**, 5583–5591.
- [3] G. Ganguly, D.-C. Sergentu and J. Autschbach, *Chem. Eur. J.*, 2020, **26**, 1776–1788.
- [4] D.-C. Sergentu, C. H. Booth and J. Autschbach, *Chem. Eur. J.*, 2021, **27**, 7239–7251.
- [5] S. G. Minasian, J. M. Keith, E. R. Batista, K. S. Boland, D. L. Clark, S. D. Conradson, S. A. Kozimor, R. L. Martin, D. E. Schwarz, D. K. Shuh, G. L. Wagner, M. P. Wilkerson, L. E. Wolfsberg and P. Yang, *J. Am. Chem. Soc.*, 2012, **134**, 5586–5597.
- [6] T. Shiozaki, W. Györffy, P. Celani and H.-J. Werner, *J. Chem. Phys.*, 2011, **135**, 081106.
